# Supplementary material for: Efficacy of a novel device for cryoprevention of oral mucositis: a randomized, blinded, multicenter, parallel group, phase 3 trial
Source: PubMed Central journal article supplement (PMC8821013; doi:10.1038/s41409-021-01512-6), 2021-11-03
Supplement: 41409_2021_1512_MOESM2_ESM.pdf [file 41409_2021_1512_MOESM2_ESM.pdf]

## Supplement 2

Conditioning high-dose chemotherapy, infection prophylaxis in conjunction with cytopenia, and supportive care including standard oral care were administered according to institutional practice. Patients with multiple myeloma were conditioned with a single-dose intravenous Melphalan 140 mg/m<sup>2</sup> or 200 mg/m<sup>2</sup> on day -1, i.e., 24 hours before ASCT. Lymphoma patients were conditioned with either of the two high-dose chemotherapy regimens BEAC or BEAM. BEAC was administered according to the following figure: Day -6: carmustine 300 mg/m<sup>2</sup> and etoposide 100 mg/m<sup>2</sup>; Day -5 to -3: etoposide 200 mg/m<sup>2</sup>, cytarabine 200 mg/m<sup>2</sup> and cyclophosphamide 35 mg/kg; Day -2: etoposide 100 mg/m<sup>2</sup>, cytarabine 200 mg/m<sup>2</sup> and cyclophosphamide 35 mg/kg; Day -1: Recovery; Day 0: ASCT. The corresponding figure for BEAM was: Day -7: carmustine 300 mg/m<sup>2</sup>; Day -6 to -3: etoposide 200 mg/m<sup>2</sup> and cytarabine 400 mg/m<sup>2</sup>; Day -2: melphalan 140 mg/m<sup>2</sup>; Day -1: Recovery; Day 0: ASCT. All patients received autologous multipotent hematopoietic stem cells derived from peripheral-blood, collected after routine mobilization by means of chemotherapy and granulocyte–colony-stimulating factor (G-CSF; filgrastim), with a dose of  $\geq 2 \times 10^6$  CD34+ cells/kg. Following ASCT, filgrastim or lipegfilgrastim was optionally administered according to the clinical routines established at each study site.
