# Supplementary material for: Efficacy of a novel device for cryoprevention of oral mucositis: a randomized, blinded, multicenter, parallel group, phase 3 trial
Source: PubMed Central journal article supplement (PMC8821013; doi:10.1038/s41409-021-01512-6), 2021-11-03
Supplement: 41409_2021_1512_MOESM3_ESM.pdf [file 41409_2021_1512_MOESM3_ESM.pdf]

## OMAS – Oral Mucositis Assessment Scale

Circle:

| Location                         | Ulceration / pseudomembrane |   |   |   | Erythema |   |   |
|----------------------------------|-----------------------------|---|---|---|----------|---|---|
| Upper lip                        | 0                           | 1 | 2 | 3 | 0        | 1 | 2 |
| Lower lip                        | 0                           | 1 | 2 | 3 | 0        | 1 | 2 |
| Right cheek                      | 0                           | 1 | 2 | 3 | 0        | 1 | 2 |
| Left cheek                       | 0                           | 1 | 2 | 3 | 0        | 1 | 2 |
| Right ventral and lateral tongue | 0                           | 1 | 2 | 3 | 0        | 1 | 2 |
| Left ventral and lateral tongue  | 0                           | 1 | 2 | 3 | 0        | 1 | 2 |
| Floor of the mouth               | 0                           | 1 | 2 | 3 | 0        | 1 | 2 |
| Palatal mucosae/gingiva          | 0                           | 1 | 2 | 3 | 0        | 1 | 2 |

Ulceration / pseudomembrane: 0 = no lesion  
 1 = < 1 cm<sup>2</sup>  
 2 = 1 – 3 cm<sup>2</sup>  
 3 = > 3 cm<sup>2</sup>

Erythema: 0 = none  
 1 = mild  
 2 = severe
